# Supplementary material for: Cues from human atrial extracellular matrix enrich the atrial differentiation of human induced pluripotent stem cell-derived cardiomyocytes
Source: Royal Society of Chemistry journal article supplement (doi:10.1039/d0bm01686a), 2021-01-01
Supplement: d0bm01686a1.pdf [file d0bm01686a1.pdf]

**Supplementary Figure 1: Cardiac differentiation using dECM-hV and dECM-hA particles.**

Schematic diagrams showing the main steps of powder particle production (A) and the differentiation procedure (B). (C) Cell count assay of control (CTRL), dECM-hV, and dECM-hA tissues (n=6 per group). Pink arrow indicates the first day of differentiation when the powder particles were added to the dECM-hA and dECM-hV groups. (D) Bright field images of CTRL, dECM-hV, and dECM-hA tissues after 15 days of differentiation. Asterisks indicate the presence of dECM-hV (yellow) and dECM-hA (red) particles in the cell culture. Black arrows indicate hiPSC-derived cardiomyocytes.

**Supplementary Figure 2: Calculation of the fractal dimension (Hausdorff's estimate).**

Representative images of superimposed different-sized grids on one analyzed region of hLV (A.1-A.4) and hLA (B.1-B.4).
