# Supplementary material for: Cues from human atrial extracellular matrix enrich the atrial differentiation of human induced pluripotent stem cell-derived cardiomyocytes
Source: Royal Society of Chemistry journal article supplement (doi:10.1039/d0bm01686a), 2021-01-01
Supplement: d0bm01686a7.pdf [file d0bm01686a7.pdf]

Table S1: Donor characteristics

|         | <b>Sex</b> | <b>Age</b> | <b>Ethnicity</b> | <b>Cause of death</b>            | <b>Risk factors</b>                                                    |
|---------|------------|------------|------------------|----------------------------------|------------------------------------------------------------------------|
| AFCA167 | M          | 35         | Hisp             | Drug intoxication                | Hypertension, obesity, and sleep apnea                                 |
| ADFW117 | M          | 27         | Cau              | Cardiac arrest S/P drug overdose | Substance abuse                                                        |
| AFKK448 | M          | 48         | Hisp             | MVA/blunt injury                 |                                                                        |
| AFKX124 | M          | 17         | Cau              | Natural causes                   | Brainstem glioma                                                       |
| AFBU040 | M          | 48         | AA               | Intracerebral hemorrhage         | Seizure, ESRD on Dialysis, Peritonitis, Smoker, CHF, GERD and AV Graft |

Hispanic; Cau: Caucasian; AA: African American; S/P: status post; OD: overdose; MVA: motor vehicle accident; ESRD: end-stage renal disease; CHF: congestive heart failure; GERD: gastroesophageal reflux disease; AV: arteriovenous.

Table S2: List of primers

| Primer                    |           | Forward                | Reverse                   |
|---------------------------|-----------|------------------------|---------------------------|
| Atrial-related genes      | KCNA5     | TAAGGAAGAGCAGGGCACTCA  | TCGGGCACTGTCTGCATTCT      |
|                           | CX40      | GAGAACACAGACAGGCAGAGG  | ACAGATGCCAAAACCTTTCGTCTCC |
|                           | SLN       | CTTGGTGTGCCCTCAGAAAT   | TCAGTCAATCCCAGGACCAT      |
|                           | Kir3.1    | GGACGGAAAACCTCACGCTTA  | TCAAGTTGGTCAAGGGGAAG      |
|                           | MLC2a     | GGAGTTCAAAGAAGCCTTCAGC | TCCTCTGGGACACTCACCTT      |
|                           | COUP-TFI  | TGCCTCAAAGCCATCGTGCTGT | CAGCAGCAGTTTGCCAAAACGG    |
|                           | COUP-TFII | TGCACGTTGACTCAGCCGAGTA | AAGCACACTGAGACTTTTCCTGC   |
|                           | N2BA      | ATCAAAGGACACTTCACACTC  | CAGCAGAACTCAGAATCGA       |
| Ventricular-related genes | MYH7      | CTCCTCATTCAAGCCCTTCGT  | ACCTGTCCAAGTTCCGCAAG      |
|                           | PLN       | AGCTGCCAAGGCTACCTAAA   | CAGCAGGACAGGAAGTCTGA      |
|                           | MLC2v     | TTGGGCGAGTGAACGTGAAA   | AATGGTTTCCTCAGGGTCCG      |
|                           | IRX4      | CGCCTTCTACTCGCTGAACA   | AGAGCTGGCTCGTAAGGGTA      |
|                           | HEY2      | TTTGAAGATGCTTCAGGCAA   | GGCACTCTCGGAATCCTATG      |
|                           | N2B       | CCAATGAGTATGGCAGTGTCA  | TACGTTCCGGAAGTAATTTGC     |
|                           | S100A1    | CTCATCAACGTGTTCCACGC   | CATCCTTCTGGGCATCCAGG      |
|                           | TNNT2     | CATTCTCACCCCTTGCCCGTG  | CCACCTCATATTTCTGCTGCTTG   |
|                           | GAPDH     | AATCCCATCACCATCTTCCAG  | AAATGAGCCCCAGCCTTC        |
