# Supplementary figures and images for: Cues from human atrial extracellular matrix enrich the atrial differentiation of human induced pluripotent stem cell-derived cardiomyocytes
Source: Royal Society of Chemistry journal article supplement (doi:10.1039/d0bm01686a), 2021-01-01

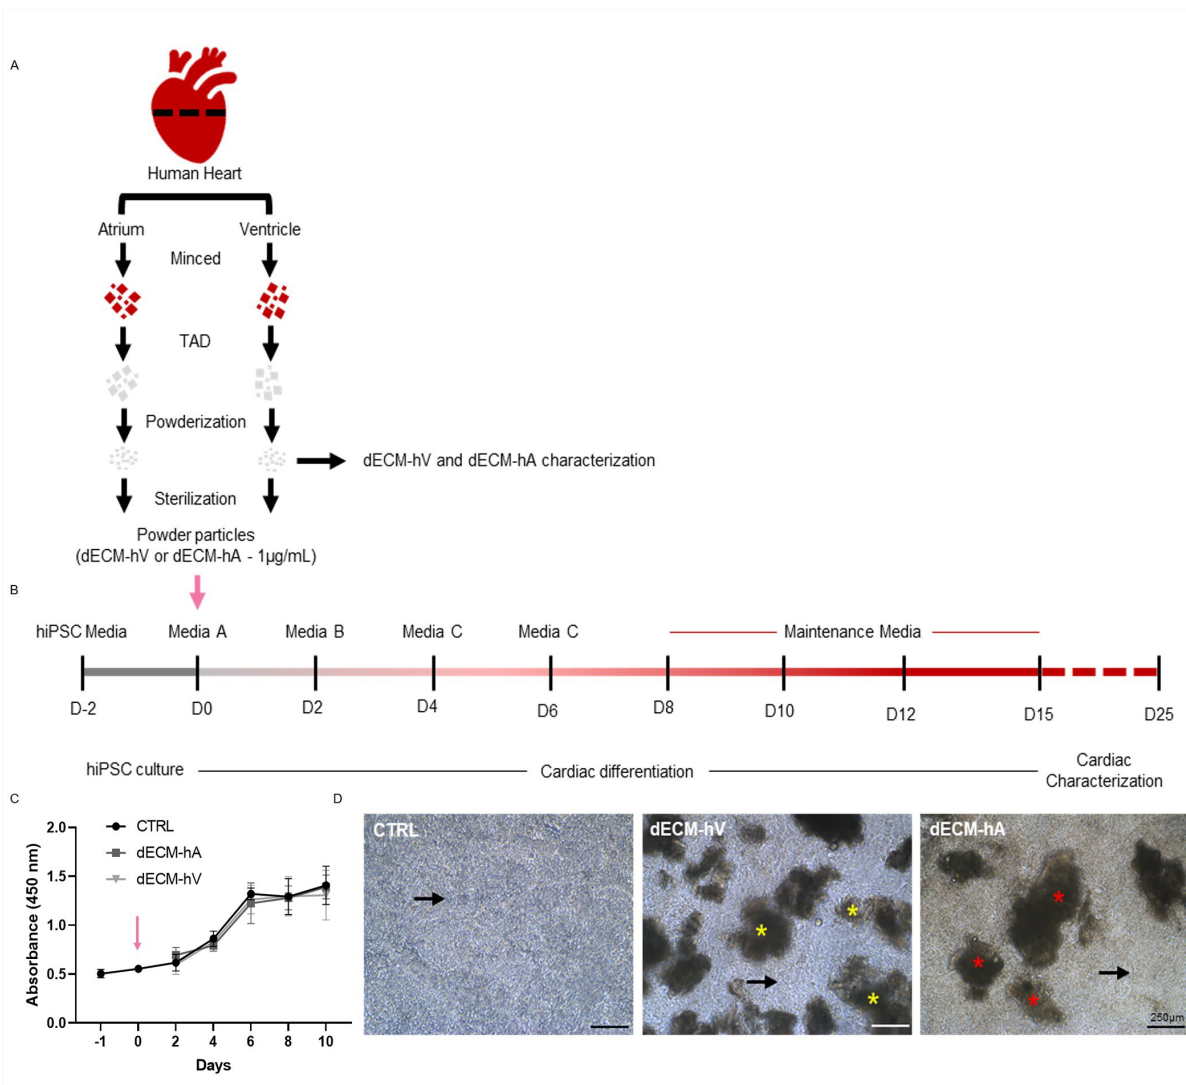

Supplement: d0bm01686a2.pdf [file d0bm01686a2.pdf]

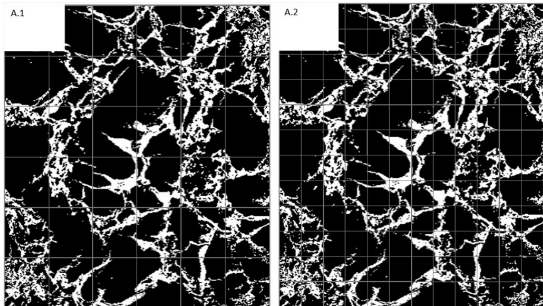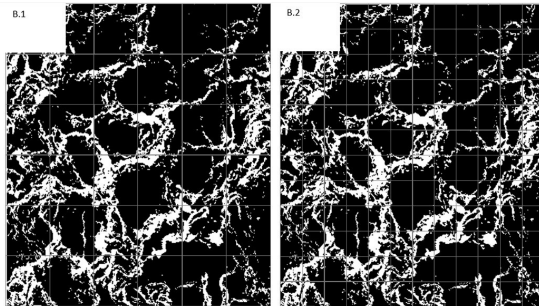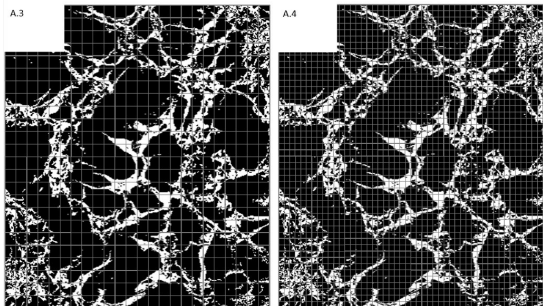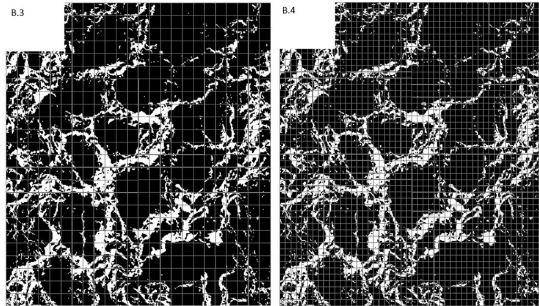

Supplement: d0bm01686a3.pdf [file d0bm01686a3.pdf]
